# Supplementary material for: Rapid synthesis of epitaxial ZnO films from aqueous solution using microwave heating
Source: Royal Society of Chemistry journal article supplement (doi:10.1039/c0jm02907f), 2010-12-06
Supplement: c0jm02907f.pdf [file c0jm02907f.pdf]

# Rapid Synthesis of Epitaxial ZnO Films from Aqueous Solution Using Microwave Heating

Jacob J. Richardson and Frederick F. Lange

## Supplementary Material

### 5 Thermodynamic Solubility Calculations

In order to predict the solubility of ZnO, the solution was modeled using thermodynamic equilibrium calculations. Equilibrium was assumed between crystalline ZnO and the aqueous solution. These calculations rely on standard thermodynamic data<sup>1,2</sup>. The thermodynamic data for all the species used in the calculations can be found in Table 1.

Using the chemical species in Table 1, the set of equilibrium expressions in Table 2 are used to describe the behavior of the solution. Assuming the values of enthalpy, entropy, and heat capacity in Table 1 to be independent of temperature, a chemical potential of each species was calculated as a function of temperature according to Eq. 1.

Eq.1

$$\mu = \Delta H_f + C_p (T - 298.15) - T \left( \Delta S_f + C_p \text{Log} \frac{T}{298.15} \right)$$

From these chemical potentials, the temperature dependent Gibbs free energy and an equilibrium constant were calculated for each equation in Table 2. The equilibrium constants were then set equal to the respective reaction quotients at equilibrium. The resulting set of equations was then solved simultaneously for all the activities as a function of temperature, pH, and total ammonia concentration. Applying dilute solution approximations, the calculated activity of each species was assumed to be equivalent to its respective equilibrium concentration in solution. The total solubility of ZnO was then calculated as the sum of the concentrations of all the zinc containing species. Supersaturation rate was

calculated as the negative time derivative ZnO solubility as the temperature of the solution was changed. Wolfram Mathematica<sup>®</sup> 5 software was used to complete these calculations.

**Table 1.** Thermodynamic Data Used in the Calculations

| Species                                              | $\Delta H_f/\text{J mol}^{-1}$ | $S/\text{J K}^{-1} \text{mol}^{-1}$ | $C_p/\text{J K}^{-1} \text{mol}^{-1}$ | Source |
|------------------------------------------------------|--------------------------------|-------------------------------------|---------------------------------------|--------|
| H <sub>2</sub> O(l)                                  | -285830                        | 69.95                               | 75.375                                | 1      |
| ZnO(c)                                               | -350460                        | 43.639                              | 41.05                                 | 1      |
| OH <sup>-</sup> (aq)                                 | -229987                        | -10.878                             | -122.601                              | 1      |
| NH <sub>3</sub> (aq)                                 | -80291                         | 111.294                             | -                                     | 1      |
| NH <sub>4</sub> <sup>+</sup> (aq)                    | -132633                        | 113.386                             | 29.518                                | 1      |
| Zn <sup>2+</sup> (aq)                                | -153971                        | -112.131                            | 30.017                                | 1      |
| Zn <sup>2+</sup> (aq)                                | -153385                        | -109.62                             | -25.94                                | 2      |
| ZnOH <sup>+</sup> (aq)                               | -363970                        | 62.76                               | 41.84                                 | 2      |
| Zn(OH) <sub>2</sub> (aq)                             | -613410                        | 61.55                               | 33.47                                 | 2      |
| Zn(OH) <sub>3</sub> <sup>2-</sup> (aq)               | -881520                        | 2.98                                | 159.83                                | 2      |
| Zn(OH) <sub>4</sub> <sup>2-</sup> (aq)               | -1124380                       | -27.51                              | 89.54                                 | 2      |
| ZnO <sub>2</sub> <sup>2-</sup> (aq)                  | -384300                        | -                                   | -                                     | 1      |
| ZnO <sub>2</sub> H(aq)                               | -457144                        | -                                   | -                                     | 1      |
| Zn(NH <sub>3</sub> ) <sub>2</sub> <sup>2+</sup> (aq) | -185770                        | -                                   | -                                     | 1      |
| Zn(NH <sub>3</sub> ) <sub>3</sub> <sup>2+</sup> (aq) | -225099                        | -                                   | -                                     | 1      |
| Zn(NH <sub>3</sub> ) <sub>3</sub> <sup>2+</sup> (aq) | -264429                        | -                                   | -                                     | 1      |
| Zn(NH <sub>3</sub> ) <sub>4</sub> <sup>2+</sup> (aq) | -533500                        | 301.248                             | -150.615                              | 1      |

**Table 2.** Equilibrium Expressions Used in the Calculations

| Reaction                                                                                                                             | $\Delta G(298 \text{ K})/\text{Jmol}^{-1}$ | Log K <sub>eq</sub> (298 K) |
|--------------------------------------------------------------------------------------------------------------------------------------|--------------------------------------------|-----------------------------|
| H <sub>2</sub> O (l) ↔ H <sup>+</sup> (aq) + OH <sup>-</sup> (aq)                                                                    | 79942                                      | -14.0                       |
| ZnO (c) + 2H <sup>+</sup> (aq) ↔ Zn <sup>2+</sup> (aq) + H <sub>2</sub> O (l)                                                        | -63754                                     | 11.2                        |
| ZnO (c) + H <sup>+</sup> (aq) ↔ ZnOH <sup>+</sup> (aq)                                                                               | -19211                                     | 3.4                         |
| ZnO (c) + H <sub>2</sub> O (l) ↔ Zn(OH) <sub>2</sub> (aq)                                                                            | 38395                                      | -6.7                        |
| ZnO (c) + 2H <sub>2</sub> O (l) ↔ Zn(OH) <sub>3</sub> <sup>-</sup> (aq) + H <sup>+</sup> (aq)                                        | 94434                                      | -16.5                       |
| ZnO (c) + 3H <sub>2</sub> O (l) ↔ Zn(OH) <sub>4</sub> <sup>2-</sup> (aq) + 2H <sup>+</sup> (aq)                                      | 167350                                     | -29.3                       |
| ZnO (c) + H <sub>2</sub> O (l) ↔ ZnO <sub>2</sub> <sup>2-</sup> (aq) + 2H <sup>+</sup> (aq)                                          | 285856                                     | -50.1                       |
| ZnO (c) + H <sub>2</sub> O (l) ↔ ZnO <sub>2</sub> H <sup>-</sup> (aq) + H <sup>+</sup> (aq)                                          | 213013                                     | -37.3                       |
| ZnO (c) + NH <sub>3</sub> (aq) + 2H <sup>+</sup> (aq) ↔ Zn(NH <sub>3</sub> ) <sub>2</sub> <sup>2+</sup> (aq) + H <sub>2</sub> O (l)  | -15511                                     | 2.7                         |
| ZnO (c) + 2NH <sub>3</sub> (aq) + 2H <sup>+</sup> (aq) ↔ Zn(NH <sub>3</sub> ) <sub>3</sub> <sup>2+</sup> (aq) + H <sub>2</sub> O (l) | 58633                                      | -10.3                       |
| ZnO (c) + 3NH <sub>3</sub> (aq) + 2H <sup>+</sup> (aq) ↔ Zn(NH <sub>3</sub> ) <sub>3</sub> <sup>2+</sup> (aq) + H <sub>2</sub> O (l) | 132776                                     | -23.3                       |
| ZnO (c) + 4NH <sub>3</sub> (aq) + 2H <sup>+</sup> (aq) ↔ Zn(NH <sub>3</sub> ) <sub>4</sub> <sup>2+</sup> (aq) + H <sub>2</sub> O (l) | -112638                                    | 19.7                        |
| NH <sub>4</sub> <sup>+</sup> (aq) ↔ NH <sub>3</sub> (aq) + H <sup>+</sup> (aq)                                                       | 52965                                      | -9.3                        |

---

## References

1 E. L. Shock, D. C. Sassani, M. Willis, and D. a. Sverjensky,  
5 *Geochimica et cosmochimica acta*, 1997, 61, 907-50.

2 W. T. Thompson, C. W. Bale, and A. D. Pelton,  
*<http://www.crct.polymtl.ca/FACT/>*.
